# Supplementary figures and images for: Active microrheology using pulsed optical tweezers to probe viscoelasticity of lamin A
Source: Royal Society of Chemistry journal article supplement (doi:10.1039/d1sm00293g), 2021-01-01

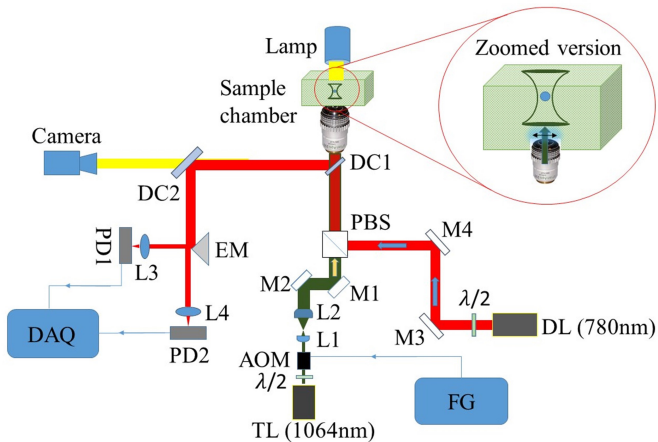

Supplement: d1sm00293g3.pdf [file d1sm00293g3.pdf]

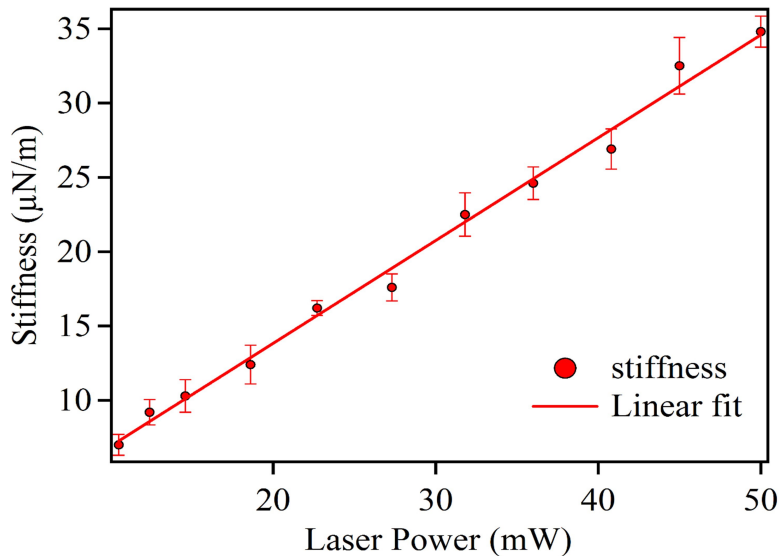

Supplement: d1sm00293g4.pdf [file d1sm00293g4.pdf]

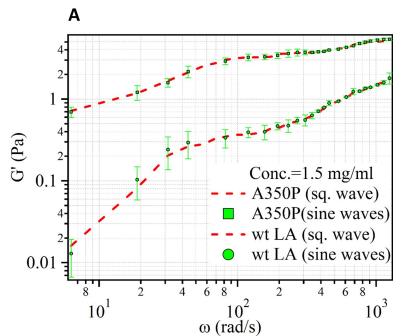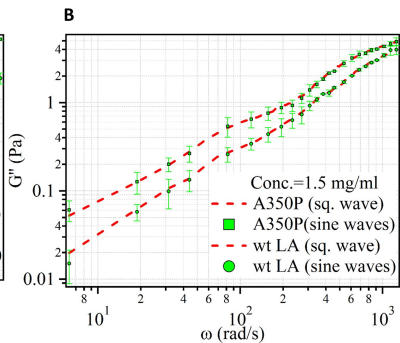

Supplement: d1sm00293g5.pdf [file d1sm00293g5.pdf]
